# Supplementary material for: The Effect of Antibiotics Treatment on the Maternal Immune Response and Gut Microbiome in Pregnant and Non-Pregnant Mice
Source: MDPI journal article supplement (doi:10.3390/nu15122723), 2023-06-12
Supplement: s1 [file s1]

Supplementary files:

Supplementary table S1: Antibodies used for staining Th cell subsets in the spleen, PP and MLN.

| Marker    | Fluorochrome | Dilution | Supplier      | mix           |
|-----------|--------------|----------|---------------|---------------|
| CD4       | PerCp-Cy5.5  | 75x      | Biolegend     | Extracellular |
| CD3       | BV605        | 25x      | Biolegend     | Extracellular |
| Tbet      | BV421        | 10x      | Biolegend     | Intracellular |
| RORγT     | PE           | 100x     | eBioscience   | Intracellular |
| Gata3     | AF647        | 100x     | BD Pharmingen | Intracellular |
| FoxP3     | Fitc         | 50x      | eBioscience   | intracellular |
| Dead/Live | Zombie NIR   | 1000x    | Biolegend     |               |

Supplementary table S2: Antibodies used for staining of dendritic cells.

| Marker    | Fluorochrome | Dilution | supplier      |
|-----------|--------------|----------|---------------|
| MHCII     | PerCp-Cy5.5  | 1:200    | Biolegend     |
| CD11c     | APC          | 1:50     | BD Pharmingen |
| CD64      | PE-Cy7       | 1:25     | Biolegend     |
| CD19      | FITC         | 1:25     | Biolegend     |
| B220      | FITC         | 1:25     | Biolegend     |
| Nkp46     | FITC         | 1:25     | Biolegend     |
| CD103     | BV421        | 1:20     | Biolegend     |
| CD11b     | PE           | 1:50     | Biolegend     |
| Dead/live | Zombie green | 1:1000   | Biolegend     |

Supplementary table S3: Antibodies used for monocyte staining.

| Marker | Fluorochrome | Dilution | Supplier   |
|--------|--------------|----------|------------|
| MHCII  | PerCp-Cy5.5  | 200x     | Biolegend  |
| Ly6C   | AF488        | 200x     | Biolegend  |
| CD43   | APC          | 100x     | Biolegend  |
| CD11b  | PE           | 50x      | Biolegend  |
| CD80   | PB           | 25x      | Biolegend  |
| Ly6G   | BV605        | 25x      | BD Horizon |

Figure S1A-C show the gating strategies for Th cell subsets, dendritic cell subsets and monocytes subsets:

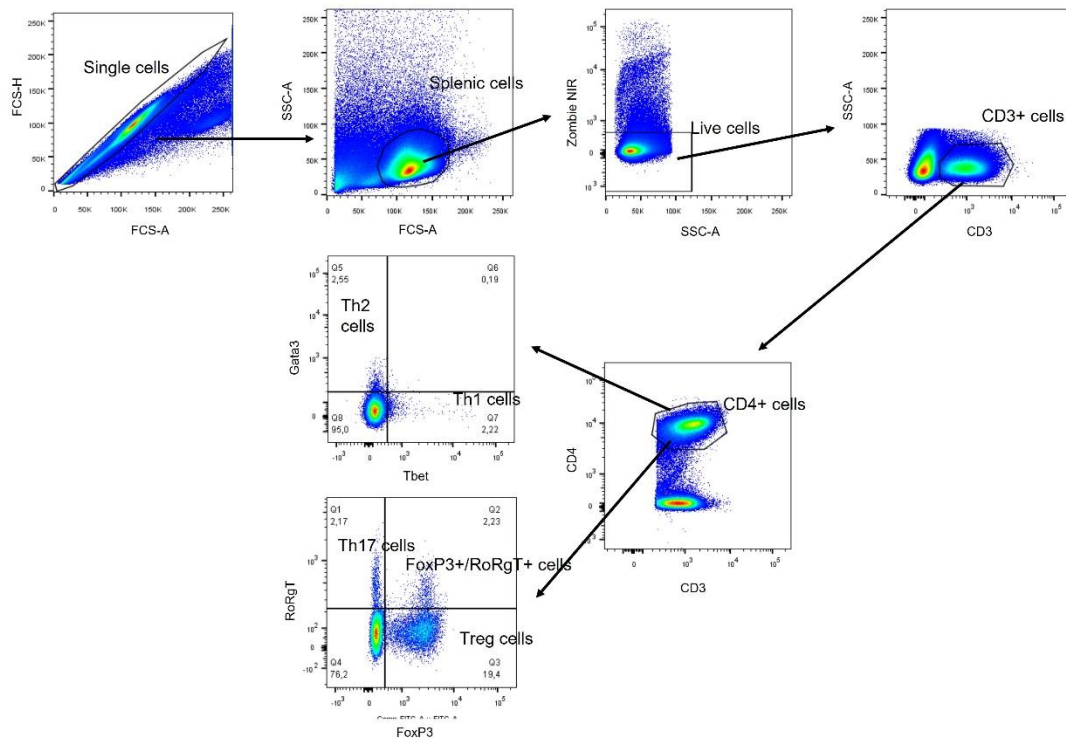

Figure S1A: Gating strategy of Th cell subsets: An example is shown for Th cell subsets in the Peyer's patches (PP). After selecting single cells, cells of the PP were gated based on size and scatter in the forward/side scatter plot. After selecting live cells, T cells were gated by selecting CD3<sup>+</sup> cells. Within the CD3<sup>+</sup> cells, CD4<sup>+</sup> were identified and within CD4<sup>+</sup> and population, percentages of cells expressing, Tbet (Th1 cells), GATA3 (Th2 cells), FoxP3 (Treg cells), RoRgT (Th17 cells) as well as FoxP3<sup>+</sup>/RoRgT<sup>+</sup> double positive cells were assessed. Gates were set using FMOs.

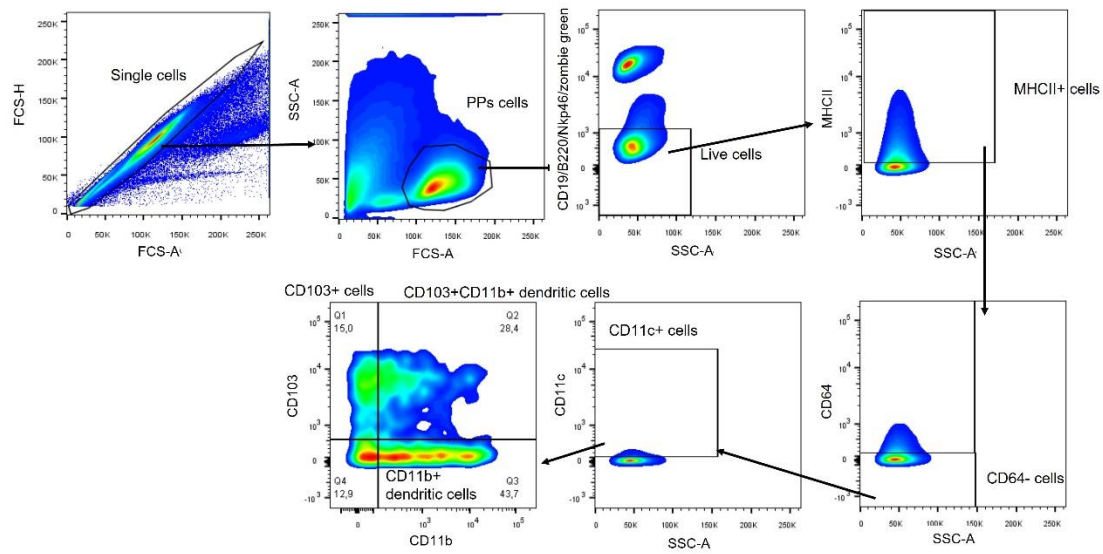

Figure S1B: Gating strategy of dendritic cells: An example is shown for gating of dendritic cells in the PP. To gate DCs, single cells were gated and cells of the PP were gated based on size and scatter in the forward/side scatter plot. After gating live cells, MHCII<sup>+</sup> cells were gated. Within these MHCII<sup>+</sup> cells, CD64<sup>+</sup> cells were macrophages. Within the MHCII<sup>+</sup>/CD64<sup>-</sup> gate, CD11c<sup>+</sup> dendritic cells were selected. Within this CD11c<sup>+</sup> population, we identified CD103<sup>+</sup>/CD11b<sup>-</sup> and CD103<sup>-</sup>/CD11b<sup>+</sup> and CD103<sup>+</sup>/CD11b<sup>+</sup> DC. Gates were set using FMOs.

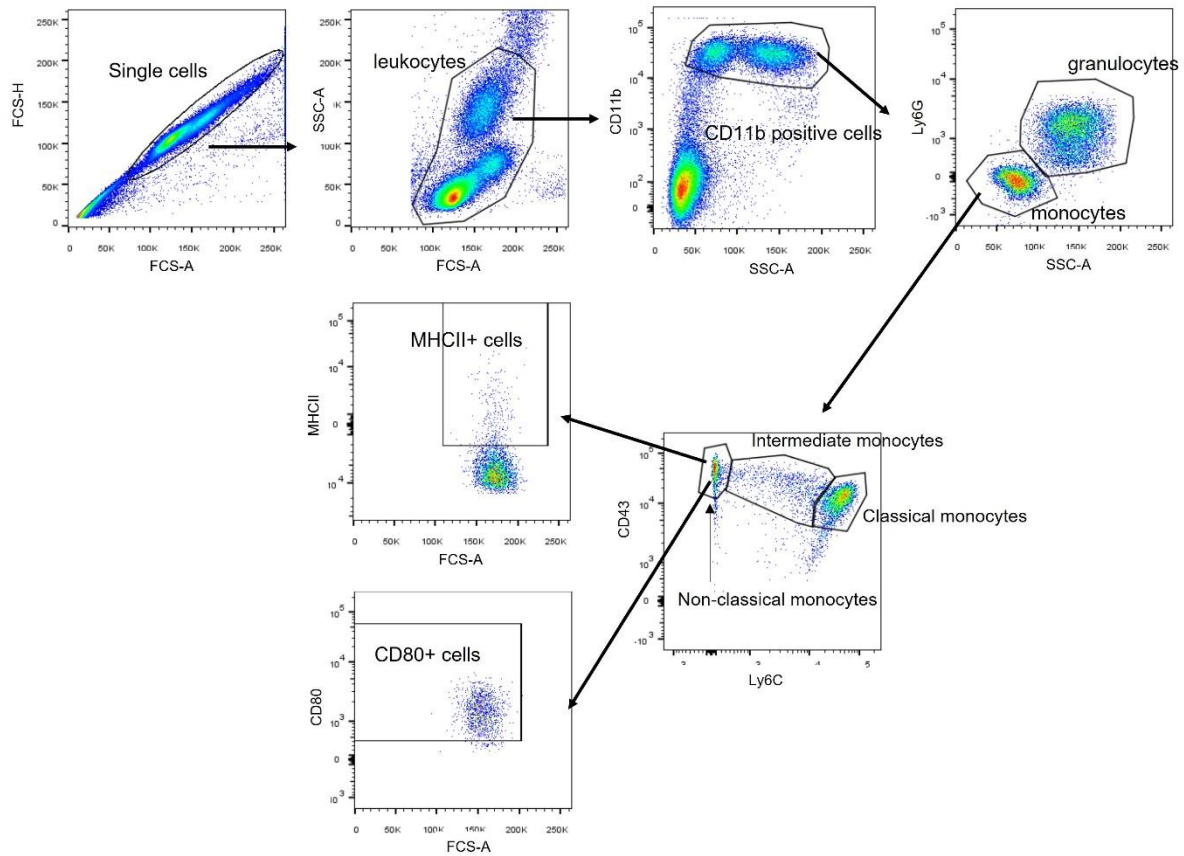

Figure S1C: Gating strategy of monocytes: After selecting single cells, blood leukocytes were first gated based on forward/side scatter characteristics. Then the CD11b positive cell population was selected and monocytes were selected by gating on Ly6G negative cells. Classical, intermediate and non-classical monocytes were selected based on their CD43 and LY6C expression. In each monocyte subpopulation, we evaluated expression of MHCII and CD80 using FMOs to set the gates (figure shows example for selection of MHCII+ and CD80+ non-classical monocytes).

Figure S2:

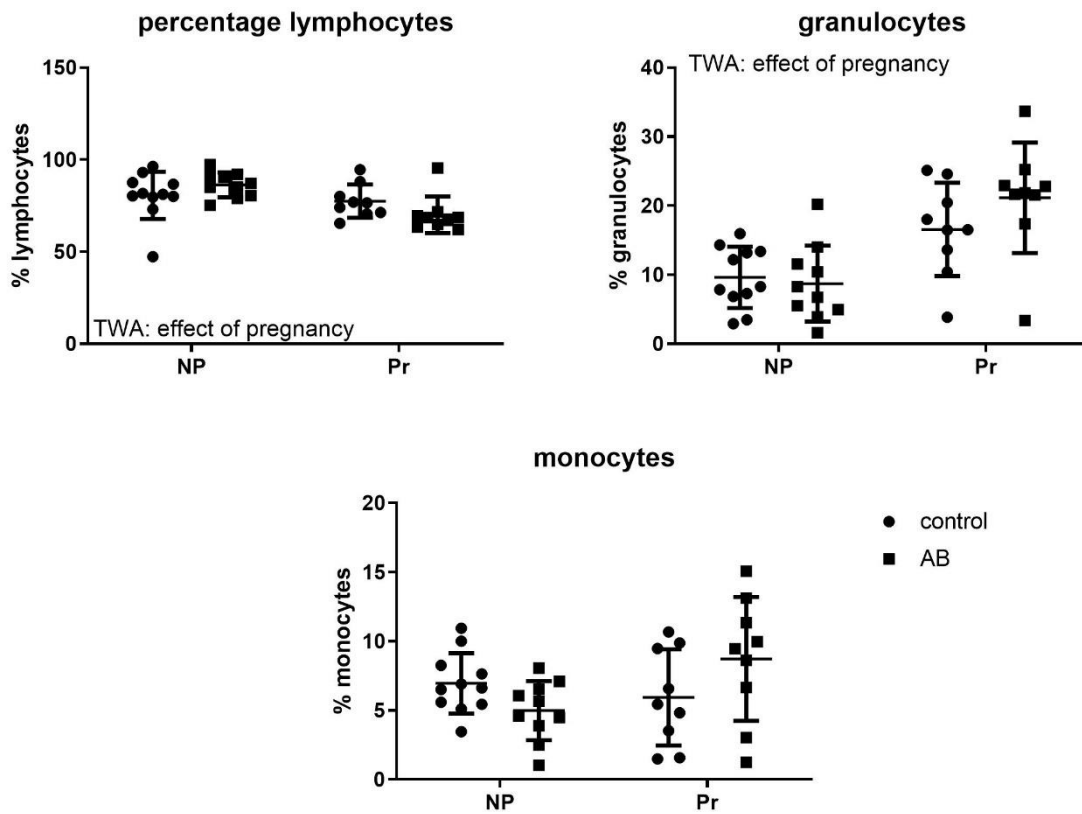

Figures S2: Peripheral blood leukocyte subpopulations in control and antibiotics treated pregnant and non-pregnant mice.

Pregnant AB treated mice: n=9; untreated pregnant mice: n=9; non-pregnant AB treated mice: n=10; untreated non-pregnant mice: n=11.

\*:Two-way ANOVA was done for all subsets followed by Sidak's multiple comparison's test,  $p < 0.05$ .

The percentages of lymphocytes and granulocytes within the total leukocyte population were affected by pregnancy (TWA,  $p < 0.05$ ). Lymphocytes were decreased, while granulocyte were increased during pregnancy. No effect of antibiotics was found on the leukocyte subpopulations in pregnant or non-pregnant mice (TWA,  $p < 0.05$ ).

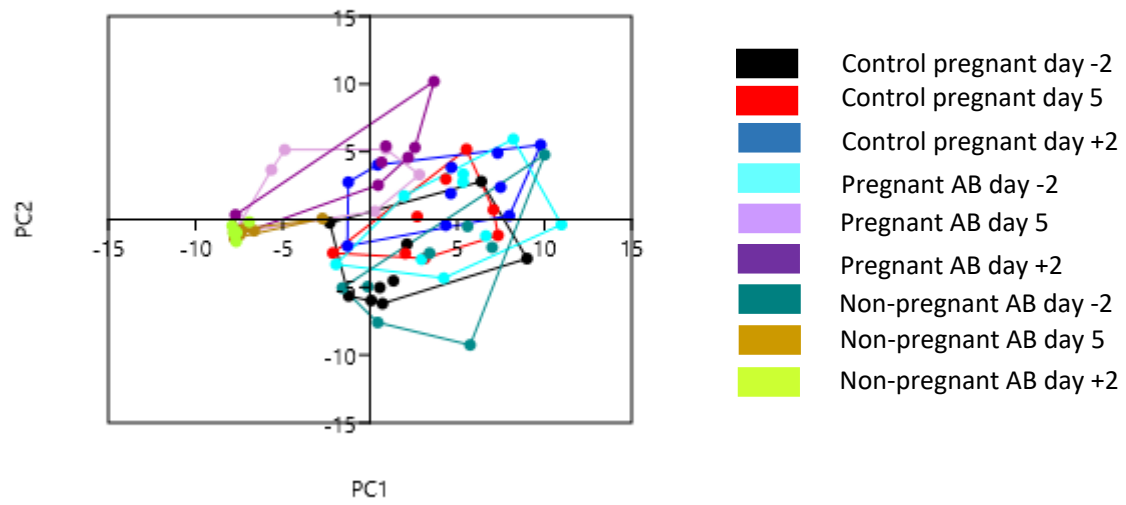

Figure S3: PCA plot of bacterial genera in control pregnant mice, pregnant AB treated mice and non-pregnant AB-treated mice before, during and after AB treatment. Pregnant AB treated mice: n=9; untreated pregnant mice: n=9; non-pregnant AB treated mice: n=8;

Table S4: The microbial genera explaining the differences in fecal microbiome in antibiotics treated pregnant mice compared with before the start of the antibiotics treatment.

| <i>Taxon</i>                      | % contribution to variation due to AB treatment | Mean day 7 AB | Mean day 14 AB | Mean day 18 AB | Friedman followed by Dunn's test (day -2 vs day 5) | Friedman followed by Dunn's test (day -2 vs day +2) |
|-----------------------------------|-------------------------------------------------|---------------|----------------|----------------|----------------------------------------------------|-----------------------------------------------------|
| <i>Alistipes</i>                  | 26.97                                           | 3.39          | 45.4           | 20.9           | ns                                                 | ns                                                  |
| <i>Barnesiella</i>                | 38.26                                           | 25.2          | 6.58           | 10.7           | *                                                  | *                                                   |
| <i>Faecalibaculum</i>             | 49.26                                           | 11.2          | 14.6           | 13.9           | ns                                                 | ns                                                  |
| <i>Lachnoclostridium</i>          | 55.47                                           | 9.7           | 5.14           | 5.87           | *                                                  | ns                                                  |
| <i>Escherichia</i>                | 61.48                                           | 0.25          | 0.89           | 10.9           | ns                                                 | ns                                                  |
| <i>Bacteroides</i>                | 64.55                                           | 1.99          | 1.17           | 5.08           | *                                                  | ns                                                  |
| <i>Lactobacillus</i>              | 66.77                                           | 1.27          | 2.7            | 1.65           | ns                                                 | ns                                                  |
| <i>Akkermansia</i>                | 68.97                                           | 2.4           | 2.46           | 0.774          | ns                                                 | ns                                                  |
| <i>Flintibacter</i>               | 71.06                                           | 2.62          | 0.941          | 3.17           | ns                                                 | ns                                                  |
| <i>Acetatifactor</i>              | 72.93                                           | 2.88          | 1.82           | 1.87           | *                                                  | ns                                                  |
| <i>Parasutterella</i>             | 74.79                                           | 3.49          | 0.86           | 0.992          | ns                                                 | ns                                                  |
| <i>unclassified Bacteroidales</i> | 76.58                                           | 3.72          | 0.797          | 0.826          | *                                                  | *                                                   |
| <i>Mucispirillum</i>              | 79.78                                           | 2.31          | 0.681          | 1.43           | ns                                                 | ns                                                  |
| <i>Intestinimonas</i>             | 81.09                                           | 1.46          | 0.654          | 2.23           | ns                                                 | ns                                                  |
| <i>Alloprevotella</i>             | 82.21                                           | 2.28          | 0.406          | 0.337          | *                                                  | *                                                   |
| <i>Oscillibacter</i>              | 83.28                                           | 1.3           | 0.588          | 1.65           | ns                                                 | ns                                                  |
| <i>Clostridium</i>                | 84.27                                           | 1.62          | 0.89           | 1.55           | ns                                                 | ns                                                  |
| <i>Christensenella</i>            | 85.02                                           | 1.2           | 0.37           | 0.573          | ns                                                 | ns                                                  |
| <i>Bifidobacterium</i>            | 85.74                                           | 0.267         | 0.598          | 1.24           | ns                                                 | ns                                                  |
| <i>Ruminiclostridium</i>          | 86.4                                            | 0.867         | 0.517          | 1.21           | ns                                                 | ns                                                  |
| <i>Odoribacter</i>                | 86.97                                           | 1.06          | 0.361          | 0.32           | ns                                                 | *                                                   |
| <i>Staphylococcus</i>             | 87.55                                           | 0.00305       | 1.08           | 0.0498         | ns                                                 | ns                                                  |
| <i>Allobaculum</i>                | 88.08                                           | 0.434         | 0.717          | 0.686          | ns                                                 | ns                                                  |
| <i>Romboutsia</i>                 | 88.6                                            | 0.24          | 0.587          | 0.557          | ns                                                 | ns                                                  |
| <i>Tyzzereella</i>                | 89.11                                           | 0.901         | 0.411          | 0.52           | ns                                                 | ns                                                  |
| <i>Oscillospira</i>               | 89.61                                           | 0.584         | 0.248          | 0.795          | ns                                                 | ns                                                  |
| <i>Sphingobium</i>                | 90.08                                           | 0.212         | 0.743          | 0.391          | ns                                                 | ns                                                  |

|                                                                         |       |         |        |         |    |    |
|-------------------------------------------------------------------------|-------|---------|--------|---------|----|----|
| <i>Desulfovibrio</i>                                                    | 90.53 | 0.637   | 0.523  | 0.435   | ns | ns |
| <i>unclassified Clostridiales</i>                                       | 90.98 | 0.924   | 0.139  | 0.271   | ns | ns |
| <i>Bacillus</i>                                                         | 91.39 | 0.00739 | 0.705  | 0.108   | ns | ns |
| <i>Anaerocolumna</i>                                                    | 91.78 | 0.748   | 0.124  | 0.143   | *  | ns |
| <i>Catabacter</i>                                                       | 92.17 | 0.472   | 0.27   | 0.374   | ns | ns |
| <i>Salmonella</i>                                                       | 92.5  | 0.0077  | 0.559  | 0.0798  | ns | ns |
| <i>Vallitalea</i>                                                       | 92.82 | 0.422   | 0.314  | 0.51    | ns | ns |
| <i>Copro bacter</i>                                                     | 93.14 | 0.548   | 0.16   | 0.199   | *  | ns |
| <i>Anaerotaenia</i>                                                     | 93.45 | 0.411   | 0.162  | 0.4     | ns | ns |
| <i>Turicibacter</i>                                                     | 93.76 | 0.291   | 0.218  | 0.394   | ns | ns |
| <i>Anaerotruncus</i>                                                    | 94.02 | 0.409   | 0.18   | 0.302   | ns | ns |
| <i>Anaeroplasma</i>                                                     | 94.27 | 0.462   | 0.13   | 0.165   | ns | ns |
| <i>Acetivibrio</i>                                                      | 94.52 | 0.437   | 0.149  | 0.359   | *  | ns |
| <i>Dorea</i>                                                            | 94.77 | 0.23    | 0.135  | 0.445   | ns | ns |
| <i>Candidatus Soleaferrea</i>                                           | 95.01 | 0.386   | 0.147  | 0.293   | ns | ns |
| <i>Roseburia</i>                                                        | 95.24 | 0.223   | 0.184  | 0.43    | ns | ns |
| <i>unclassified Cyanobacteria</i>                                       | 95.47 | 0.354   | 0.0841 | 0.152   | ns | ns |
| <i>Saccharofermentans</i>                                               | 95.67 | 0.349   | 0.093  | 0.218   | *  | ns |
| <i>Bilophila</i>                                                        | 95.85 | 0.216   | 0.0822 | 0.237   | ns | ns |
| <i>Hydrogenoanaerobacterium</i>                                         | 96.02 | 0.193   | 0.113  | 0.293   | ns | ns |
| <i>Ruminococcus</i>                                                     | 96.18 | 0.245   | 0.141  | 0.206   | ns | ns |
| <i>Robinsoniella</i>                                                    | 96.34 | 0.303   | 0.066  | 0.0695  | ns | ns |
| <i>Rhodospirillum</i>                                                   | 96.48 | 0.21    | 0.0801 | 0.129   | ns | ns |
| <i>Rikenella</i>                                                        | 96.62 | 0.266   | 0.0397 | 0.0518  | *  | ns |
| <i>Enterococcus</i>                                                     | 96.75 | 0.0185  | 0.198  | 0.0572  | ns | ns |
| <i>Pseudomonas</i>                                                      | 96.87 | 0.00706 | 0.194  | 0.0677  | ns | ns |
| <i>Prevotella</i>                                                       | 96.98 | 0.224   | 0.0136 | 0.0135  | *  | *  |
| <i>Marvinbryantia</i>                                                   | 97.09 | 0.206   | 0.0466 | 0.0758  | ns | ns |
| <i>Dehalobacterium</i>                                                  | 97.2  | 0.148   | 0.0697 | 0.177   | ns | ns |
| <i>unclassified Burkholderiales</i>                                     | 97.31 | 0.212   | 0.0135 | 0.00627 | *  | ns |
| <i>Tannerella</i>                                                       | 97.42 | 0.216   | 0.0146 | 0.017   | *  | *  |
| <i>Coproccoccus</i>                                                     | 97.52 | 0.1     | 0.104  | 0.14    | ns | ns |
| <i>Blautia</i>                                                          | 97.62 | 0.167   | 0.0886 | 0.159   | ns | ns |
| <i>Butyrivibrio</i>                                                     | 97.72 | 0.079   | 0.0587 | 0.154   | ns | ns |
| <i>Pseudoflavonifractor</i>                                             | 97.82 | 0.152   | 0.0617 | 0.11    | ns | ns |
| <i>Gracilibacter</i>                                                    | 97.91 | 0.147   | 0.0739 | 0.116   | *  | ns |
| <i>Stomatobaculum</i>                                                   | 98    | 0.0885  | 0.0491 | 0.124   | ns | ns |
| <i>Ruthenibacterium</i>                                                 | 98.08 | 0.0501  | 0.0275 | 0.137   | ns | ns |
| <i>Anaeromassilibacillus</i>                                            | 98.16 | 0.0938  | 0.0812 | 0.0983  | ns | ns |
| <i>Anaerobacterium</i>                                                  | 98.23 | 0.0988  | 0.0911 | 0.128   | ns | ns |
| <i>unclassified Clostridiales</i><br><i>Family XIII. Incertae Sedis</i> | 98.31 | 0.0937  | 0.0462 | 0.1     | ns | ns |
| <i>unclassified Lachnospiraceae</i>                                     | 98.38 | 0.143   | 0.0433 | 0.0508  | *  | ns |



|                                        |       |         |         |         |    |    |
|----------------------------------------|-------|---------|---------|---------|----|----|
| <i>Eisenbergiella</i>                  | 98.44 | 0.13    | 0.0325  | 0.0677  | ns | ns |
| <i>Syntrophococcus</i>                 | 98.51 | 0.0668  | 0.0664  | 0.0265  | ns | ns |
| <i>unclassified Erysipelotrichales</i> | 98.57 | 0.1     | 0.0585  | 0.0342  | ns | *  |
| <i>unclassified Clostridia</i>         | 98.64 | 0.0642  | 0.0209  | 0.0942  | *  | ns |
| <i>Anaerostipes</i>                    | 98.69 | 0.115   | 0.0194  | 0.0131  | *  | *  |
| <i>Flavonifractor</i>                  | 98.74 | 0.0959  | 0.0139  | 0.0233  | *  | ns |
| <i>Natranaerovirga</i>                 | 98.79 | 0.0946  | 0.0309  | 0.0456  | ns | ns |
| <i>Enterorhabdus</i>                   | 98.84 | 0.0112  | 0.0758  | 0.0392  | ns | ns |
| <i>Defluviitalea</i>                   | 98.89 | 0.0744  | 0.0217  | 0.0272  | ns | ns |
| <i>Hungatella</i>                      | 98.93 | 0.0715  | 0.0189  | 0.0528  | ns | ns |
| <i>Fournierella</i>                    | 98.98 | 0.0527  | 0.0187  | 0.0599  | ns | ns |
| <i>unclassified Betaproteobacteria</i> | 99.01 | 0.0701  | 0.0127  | 0.00507 | ns | ns |
| <i>Murimonas</i>                       | 99.05 | 0.0474  | 0.0358  | 0.0497  | ns | ns |
| <i>Parvibacter</i>                     | 99.09 | 0.0109  | 0.0543  | 0.0336  | ns | ns |
| <i>Cryptanaerobacter</i>               | 99.12 | 0.0664  | 0.0135  | 0.026   | ns | ns |
| <i>Oribacterium</i>                    | 99.15 | 0.0582  | 0.00823 | 0.00412 | *  | *  |
| <i>Alkalibaculum</i>                   | 99.18 | 0.0244  | 0.0202  | 0.0359  | ns | ns |
| <i>Alkalibacter</i>                    | 99.2  | 0.0491  | 0.00746 | 0.01    | ns | ns |
| <i>Butyricicoccus</i>                  | 99.23 | 0.0383  | 0.0119  | 0.0265  | ns | ns |
| <i>Anaerovorax</i>                     | 99.26 | 0.0322  | 0.0146  | 0.0243  | ns | ns |
| <i>unclassified Erysipelotrichia</i>   | 99.28 | 0.0444  | 0.01    | 0.0157  | ns | ns |
| <i>Mobilitalea</i>                     | 99.3  | 0.0432  | 0.00957 | 0.0047  | ns | *  |
| <i>Herbinix</i>                        | 99.32 | 0.0445  | 0.00496 | 0.00432 | *  | *  |
| <i>Massilia</i>                        | 99.35 | 0.0397  | 0.00843 | 0.00305 | ns | ns |
| <i>Mageeibacillus</i>                  | 99.37 | 0.0149  | 0.0113  | 0.0355  | ns | ns |
| <i>unclassified Eubacteriaceae</i>     | 99.39 | 0.0332  | 0.00781 | 0.0231  | ns | ns |
| <i>Cohaesibacter</i>                   | 99.41 | 0.00902 | 0.0318  | 0.00912 | ns | ns |
| <i>Filifactor</i>                      | 99.43 | 0.0295  | 0.00849 | 0.0172  | ns | ns |
| <i>Alkaliphilus</i>                    | 99.45 | 0.0328  | 0.00719 | 0.0162  | ns | ns |
| <i>Peptococcus</i>                     | 99.47 | 0.0291  | 0.0133  | 0.0161  | ns | ns |
| <i>Herbaspirillum</i>                  | 99.49 | 0.0356  | 0.00298 | 0.00169 | ns | ns |
| <i>Sporobacter</i>                     | 99.51 | 0.0366  | 0.00849 | 0.0138  | *  | ns |
| <i>unclassified Porphyromonadaceae</i> | 99.53 | 0.0152  | 0.00746 | 0.0191  | ns | ns |
| <i>Falcatimonas</i>                    | 99.54 | 0.0249  | 0.0127  | 0.0144  | ns | ns |
| <i>Kopriimonas</i>                     | 99.56 | 0.027   | 0.00482 | 0.00814 | ns | ns |
| <i>unclassified Clostridiaceae</i>     | 99.58 | 0.0313  | 0.00272 | 0.00186 | ns | ns |
| <i>Olsenella</i>                       | 99.59 | 0.0239  | 0.0142  | 0.00408 | ns | ns |
| <i>Abyssivirga</i>                     | 99.61 | 0.0156  | 0.00392 | 0.0201  | ns | ns |
| <i>Falsiporphyromonas</i>              | 99.62 | 0.0241  | 0.00282 | 0.00466 | ns | ns |
| <i>Sutterella</i>                      | 99.63 | 0.0185  | 0.00531 | 0.00792 | ns | ns |
| <i>Nocardioides</i>                    | 99.65 | 0.0254  | 0       | 0       | ns | ns |

|                                                     |       |         |          |          |    |    |
|-----------------------------------------------------|-------|---------|----------|----------|----|----|
| <i>Fusicatenibacter</i>                             | 99.66 | 0.0225  | 0.00423  | 0.00349  | ns | ns |
| <i>Intestinibacter</i>                              | 99.67 | 0.0191  | 0        | 0.00711  | ns | ns |
| <i>Faecalibacterium</i>                             | 99.68 | 0.0178  | 0.00444  | 0.0121   | ns | ns |
| <i>Hespellia</i>                                    | 99.69 | 0.0183  | 0.00648  | 0.00729  | ns | ns |
| <i>unclassified Candidatus<br/>Saccharibacteria</i> | 99.7  | 0.0163  | 0.00896  | 0.00487  | ns | ns |
| <i>Paeniclostridium</i>                             | 99.72 | 0.0171  | 0.000941 | 0.0061   | ns | ns |
| <i>unclassified<br/>Alphaproteobacteria</i>         | 99.73 | 0.02    | 0.00369  | 0.00819  | *  | ns |
| <i>Papillibacter</i>                                | 99.74 | 0.0186  | 0.00583  | 0.00643  | ns | ns |
| <i>unclassified Ruminococcaceae</i>                 | 99.75 | 0.0164  | 0.00561  | 0.00102  | ns | ns |
| <i>Anaerosporebacter</i>                            | 99.76 | 0.0125  | 0.00765  | 0.01     | ns | ns |
| <i>Anaerobium</i>                                   | 99.76 | 0.0142  | 0.00402  | 0.00351  | ns | ns |
| <i>Chloroflexus</i>                                 | 99.77 | 0.0158  | 0.00207  | 0.00161  | ns | ns |
| <i>unclassified Paenibacillaceae</i>                | 99.78 | 0.0148  | 0.00207  | 0.00242  | ns | ns |
| <i>Acetanaerobacterium</i>                          | 99.79 | 0.0119  | 0.00934  | 0.00504  | ns | ns |
| <i>Corynebacterium</i>                              | 99.8  | 0.00107 | 0.00181  | 0.0149   | ns | ns |
| <i>Desulfonatronum</i>                              | 99.81 | 0.0131  | 0.00198  | 0.0027   | ns | ns |
| <i>Azoarcus</i>                                     | 99.81 | 0.015   | 0        | 0        | ns | ns |
| <i>Erysipelatoclostridium</i>                       | 99.82 | 0.00386 | 0.00456  | 0.00999  | ns | ns |
| <i>Lachnoanaerobaculum</i>                          | 99.83 | 0.0134  | 0.00104  | 0.000746 | ns | ns |
| <i>Chitinimonas</i>                                 | 99.83 | 0.0131  | 0.00104  | 0        | ns | ns |
| <i>Holdemania</i>                                   | 99.84 | 0.00918 | 0.000909 | 0.00574  | ns | ns |
| <i>unclassified<br/>Erysipelotrichaceae</i>         | 99.85 | 0.005   | 0.00276  | 0.00724  | ns | ns |
| <i>Kluyvera</i>                                     | 99.85 | 0.00493 | 0        | 0.00738  | ns | ns |
| <i>Ethanoligenens</i>                               | 99.86 | 0.01    | 0.00336  | 0        | ns | ns |
| <i>Candidatus Stoquefichus</i>                      | 99.86 | 0.00388 | 0.00285  | 0.00661  | ns | ns |
| <i>Dysgonomonas</i>                                 | 99.87 | 0.0099  | 0.00185  | 0.00102  | ns | ns |
| <i>Caproiciproducens</i>                            | 99.87 | 0.00948 | 0.000941 | 0.00102  | ns | ns |
| <i>Asaccharospora</i>                               | 99.88 | 0.00773 | 0        | 0.00305  | ns | ns |
| <i>Propionivibrio</i>                               | 99.88 | 0.00931 | 0.00104  | 0        | ns | ns |
| <i>unclassified<br/>Anaeroplasmatales</i>           | 99.89 | 0.00685 | 0        | 0.00386  | ns | ns |
| <i>unclassified Mollicutes</i>                      | 99.89 | 0.00412 | 0.00444  | 0.00444  | ns | ns |
| <i>Breznakia</i>                                    | 99.9  | 0.00382 | 0.00262  | 0.00623  | ns | ns |
| <i>Methyloversatilis</i>                            | 99.9  | 0.00836 | 0        | 0.000807 | ns | ns |
| <i>Azospira</i>                                     | 99.91 | 0.008   | 0        | 0.00162  | ns | ns |

|                                               |       |          |          |          |    |    |
|-----------------------------------------------|-------|----------|----------|----------|----|----|
| <i>Casaltella</i>                             | 99.91 | 0.00107  | 0        | 0.00752  | ns | ns |
| <i>Desulfitobacterium</i>                     | 99.92 | 0.00574  | 0.00182  | 0.00405  | ns | ns |
| <i>Aestuariispira</i>                         | 99.92 | 0.00491  | 0.00275  | 0.00284  | ns | ns |
| <i>Acetobacter</i>                            | 99.92 | 0.00708  | 0        | 0        | ns | ns |
| <i>Methylophilus</i>                          | 99.93 | 0.00708  | 0        | 0        | ns | ns |
| <i>unclassified<br/>Peptostreptococcaceae</i> | 99.93 | 0.00384  | 0.00104  | 0.00305  | ns | ns |
| <i>Lutispora</i>                              | 99.93 | 0.00595  | 0.000941 | 0        | ns | ns |
| <i>Parapedobacter</i>                         | 99.94 | 0.00587  | 0        | 0        | ns | ns |
| <i>Terrisporobacter</i>                       | 99.94 | 0.00383  | 0        | 0.00203  | ns | ns |
| <i>Herbivorax</i>                             | 99.94 | 0.00291  | 0.00181  | 0.00183  | ns | ns |
| <i>Paraeggerthella</i>                        | 99.95 | 0        | 0.00419  | 0.00186  | ns | ns |
| <i>Natronincola</i>                           | 99.95 | 0.00377  | 0.00104  | 0.00102  | ns | ns |
| <i>Thermotalea</i>                            | 99.95 | 0.0039   | 0.00195  | 0        | ns | ns |
| <i>unclassified<br/>Deltaproteobacteria</i>   | 99.95 | 0.00297  | 0.00198  | 0.000807 | ns | ns |
| <i>Thauera</i>                                | 99.96 | 0.00396  | 0        | 0.000841 | ns | ns |
| <i>Clostridioides</i>                         | 99.96 | 0.00391  | 0.000941 | 0        | ns | ns |
| <i>Sporanaerobacter</i>                       | 99.96 | 0.00288  | 0.00195  | 0        | ns | ns |
| <i>Variovorax</i>                             | 99.96 | 0.00412  | 0        | 0        | ns | ns |
| <i>Catonella</i>                              | 99.96 | 0.00315  | 0        | 0.00102  | ns | ns |
| <i>Serpentinicella</i>                        | 99.97 | 0.00192  | 0.00207  | 0        | ns | ns |
| <i>Schlegelella</i>                           | 99.97 | 0.00315  | 0        | 0.000841 | ns | ns |
| <i>Acetoanaerobium</i>                        | 99.97 | 0.00295  | 0        | 0.00102  | ns | ns |
| <i>Kiloniella</i>                             | 99.97 | 0.000971 | 0.00194  | 0.00102  | ns | ns |
| <i>Rubrivivax</i>                             | 99.97 | 0.00203  | 0.000909 | 0.000873 | ns | ns |
| <i>Parasporobacterium</i>                     | 99.97 | 0.00186  | 0        | 0.00171  | ns | ns |
| <i>Caldimonas</i>                             | 99.98 | 0.0031   | 0        | 0        | ns | ns |
| <i>Pedobacter</i>                             | 99.98 | 0.00196  | 0.00147  | 0        | ns | ns |
| <i>Candidatus Vestibaculum</i>                | 99.98 | 0.00289  | 0        | 0        | ns | ns |
| <i>Caloranaerobacter</i>                      | 99.98 | 0.00288  | 0        | 0        | ns | ns |
| <i>Brassicibacter</i>                         | 99.98 | 0.00288  | 0        | 0        | ns | ns |

|                                    |       |          |          |         |    |    |
|------------------------------------|-------|----------|----------|---------|----|----|
| <i>Sphingobacterium</i>            | 99.98 | 0.000971 | 0.00104  | 0.00102 | ns | ns |
| <i>Lachnospira</i>                 | 99.98 | 0.000991 | 0        | 0.00183 | ns | ns |
| <i>unclassified Bacteroidia</i>    | 99.99 | 0.00191  | 0.000909 | 0       | ns | ns |
| <i>Gemmiger</i>                    | 99.99 | 0.00191  | 0.000732 | 0       | ns | ns |
| <i>Mycobacterium</i>               | 99.99 | 0.000961 | 0        | 0.00149 | ns | ns |
| <i>Atopobium</i>                   | 99.99 | 0.00208  | 0        | 0       | ns | ns |
| <i>Desulfotomaculum</i>            | 99.99 | 0.00206  | 0        | 0       | ns | ns |
| <i>Vibrio</i>                      | 99.99 | 0.00194  | 0        | 0       | ns | ns |
| <i>Comamonas</i>                   | 99.99 | 0.00194  | 0        | 0       | ns | ns |
| <i>Mangroviflexus</i>              | 99.99 | 0.00188  | 0        | 0       | ns | ns |
| <i>Proteiniborus</i>               | 99.99 | 0.000991 | 0.000941 | 0       | ns | ns |
| <i>Insolitispirillum</i>           | 100   | 0        | 0        | 0.00182 | ns | ns |
| <i>Fusibacter</i>                  | 100   | 0.000971 | 0.000941 | 0       | ns | ns |
| <i>Aerococcus</i>                  | 100   | 0        | 0.00104  | 0       | ns | ns |
| <i>Shuttleworthia</i>              | 100   | 0.000991 | 0        | 0       | ns | ns |
| <i>Moryella</i>                    | 100   | 0.000991 | 0        | 0       | ns | ns |
| <i>Fodinicurvata</i>               | 100   | 0.000971 | 0        | 0       | ns | ns |
| <i>unclassified Alcaligenaceae</i> | 100   | 0.000971 | 0        | 0       | ns | ns |
| <i>Oxobacter</i>                   | 100   | 0        | 0.000941 | 0       | ns | ns |
| <i>Geosporobacter</i>              | 100   | 0.000916 | 0        | 0       | ns | ns |

\*: Friedman followed by Dunn's multiple comparison test,  $p < 0.05$ . ns: non-significant.

Table S5: The microbial genera explaining the differences in fecal microbiome in antibiotics treated non-pregnant mice compared with before the start of the antibiotics treatment.

| <i>Taxon</i>                           | % contribution to variation due to AB treatment | Cumulative % | Mean day -2 | Mean day 5 | Mean day +2 | Friedman followed by Dunn's test (day -2 vs day 5) | Friedman followed by Dunn's test (day -2 vs day +2) |
|----------------------------------------|-------------------------------------------------|--------------|-------------|------------|-------------|----------------------------------------------------|-----------------------------------------------------|
| <i>Alistipes</i>                       | 34.07                                           | 34.07        | 2.27        | 59         | 62          | *                                                  | *                                                   |
| <i>Bacteroides</i>                     | 18.24                                           | 52.31        | 2.5         | 20.7       | 30.8        | ns                                                 | ns                                                  |
| <i>Barnesiella</i>                     | 13.78                                           | 66.1         | 31.6        | 2.58       | 0.152       | *                                                  | *                                                   |
| <i>Faecalibaculum</i>                  | 7.513                                           | 73.61        | 10.2        | 9.8        | 0.208       | ns                                                 | ns                                                  |
| <i>Akkermansia</i>                     | 3.898                                           | 77.51        | 4.94        | 1.34       | 4.1         | ns                                                 | ns                                                  |
| <i>Lachnoclostridium</i>               | 2.969                                           | 80.48        | 6.67        | 0.761      | 0.114       | *                                                  | *                                                   |
| <i>Parasutterella</i>                  | 2.423                                           | 82.9         | 5.49        | 0.396      | 0.00601     | *                                                  | *                                                   |
| <i>Acetatifactor</i>                   | 1.407                                           | 85.93        | 3.18        | 0.271      | 0.0679      | ns                                                 | ns                                                  |
| <i>unclassified Bacteroidales</i>      | 1.327                                           | 87.25        | 3.04        | 0.157      | 0.0282      | *                                                  | *                                                   |
| <i>Allobaculum</i>                     | 1.097                                           | 88.35        | 2.15        | 0.648      | 0.0504      | ns                                                 | ns                                                  |
| <i>Alloprevotella</i>                  | 0.9548                                          | 89.31        | 2.17        | 0.09       | 0.00691     | *                                                  | *                                                   |
| <i>Flintibacter</i>                    | 0.8618                                          | 90.17        | 1.97        | 0.263      | 0.144       | *                                                  | ns                                                  |
| <i>Oscillibacter</i>                   | 0.7039                                          | 90.87        | 1.56        | 0.213      | 0.061       | ns                                                 | ns                                                  |
| <i>Escherichia</i>                     | 0.604                                           | 91.48        | 0.00219     | 0.0485     | 1.41        | ns                                                 | ns                                                  |
| <i>Clostridium</i>                     | 0.5441                                          | 92.02        | 1.25        | 0.209      | 0.0438      | *                                                  | ns                                                  |
| <i>Intestinimonas</i>                  | 0.5171                                          | 92.54        | 1.16        | 0.185      | 0.0954      | ns                                                 | ns                                                  |
| <i>Mucispirillum</i>                   | 0.4666                                          | 93           | 1.04        | 0.128      | 0.011       | ns                                                 | ns                                                  |
| <i>Ruminiclostridium</i>               | 0.3296                                          | 93.33        | 0.758       | 0.175      | 0.0297      | ns                                                 | ns                                                  |
| <i>Tyzzerella</i>                      | 0.3158                                          | 93.65        | 0.727       | 0.0609     | 0.019       | *                                                  | *                                                   |
| <i>Bifidobacterium</i>                 | 0.2894                                          | 93.94        | 0.393       | 0.417      | 0.056       | ns                                                 | ns                                                  |
| <i>Sphingobium</i>                     | 0.2682                                          | 94.21        | 0.291       | 0.376      | 0.00748     | ns                                                 | ns                                                  |
| <i>Desulfovibrio</i>                   | 0.2592                                          | 94.47        | 0.568       | 0.12       | 0.0154      | ns                                                 | *                                                   |
| <i>Vallitalea</i>                      | 0.2548                                          | 94.72        | 0.586       | 0.0633     | 0.0101      | ns                                                 | ns                                                  |
| <i>Oscillospira</i>                    | 0.2487                                          | 94.97        | 0.558       | 0.0815     | 0.0237      | ns                                                 | ns                                                  |
| <i>Coprobacter</i>                     | 0.2412                                          | 95.21        | 0.548       | 0.0459     | 0.00161     | *                                                  | *                                                   |
| <i>unclassified Clostridiales</i>      | 0.2179                                          | 95.43        | 0.503       | 0.0415     | 0.015       | *                                                  | ns                                                  |
| <i>Lactobacillus</i>                   | 0.1918                                          | 95.62        | 0.348       | 0.216      | 0.0208      | ns                                                 | ns                                                  |
| <i>Anaerotruncus</i>                   | 0.1901                                          | 95.81        | 0.423       | 0.0554     | 0.0107      | ns                                                 | ns                                                  |
| <i>unclassified Erysipelotrichales</i> | 0.1751                                          | 95.99        | 0.396       | 0.0368     | 0.0034      | *                                                  | *                                                   |
| <i>Acetivibrio</i>                     | 0.1662                                          | 96.15        | 0.384       | 0.0474     | 0.00599     | *                                                  | ns                                                  |
| <i>Dorea</i>                           | 0.1657                                          | 96.32        | 0.372       | 0.0518     | 0.00991     | ns                                                 | ns                                                  |
| <i>unclassified Burkholderiales</i>    | 0.1502                                          | 96.47        | 0.341       | 0.00739    | 0           | *                                                  | *                                                   |
| <i>Ruminococcus</i>                    | 0.1462                                          | 96.61        | 0.337       | 0.0342     | 0.0123      | *                                                  | ns                                                  |
| <i>Odoribacter</i>                     | 0.14                                            | 96.75        | 0.311       | 0.0435     | 0.00577     | ns                                                 | ns                                                  |
| <i>Prevotella</i>                      | 0.1225                                          | 96.88        | 0.278       | 0.00569    | 0.00354     | ns                                                 | *                                                   |
| <i>unclassified Cyanobacteria</i>      | 0.1215                                          | 97           | 0.267       | 0.0277     | 0.00256     | ns                                                 | ns                                                  |

|                                                               |         |       |        |          |          |    |    |
|---------------------------------------------------------------|---------|-------|--------|----------|----------|----|----|
| <i>Anaerotaenia</i>                                           | 0.1026  | 97.1  | 0.233  | 0.0361   | 0.00169  | *  | ns |
| <i>Rhodospirillum</i>                                         | 0.1017  | 97.2  | 0.211  | 0.0452   | 0        | ns | *  |
| <i>Tannerella</i>                                             | 0.0979  | 97.3  | 0.223  | 0.0122   | 0        | *  | *  |
| <i>Roseburia</i>                                              | 0.09645 | 97.4  | 0.207  | 0.0625   | 0.00758  | ns | ns |
| <i>Candidatus Soleaferrea</i>                                 | 0.09182 | 97.49 | 0.204  | 0.0502   | 0.0156   | ns | ns |
| <i>Turicibacter</i>                                           | 0.09037 | 97.58 | 0.179  | 0.069    | 0.00512  | ns | *  |
| <i>Rikenella</i>                                              | 0.09027 | 97.67 | 0.207  | 0.00648  | 0.00334  | *  | *  |
| <i>unclassified Lachnospiraceae</i>                           | 0.09011 | 97.76 | 0.205  | 0.016    | 0.00514  | *  | *  |
| <i>Hydrogenoanaerobacterium</i>                               | 0.08678 | 97.85 | 0.195  | 0.0287   | 0.00495  | ns | ns |
| <i>Robinsoniella</i>                                          | 0.08374 | 97.93 | 0.191  | 0.0105   | 0.00242  | *  | *  |
| <i>Anaerocolumna</i>                                          | 0.08001 | 98.01 | 0.178  | 0.0239   | 0.00728  | ns | *  |
| <i>Blautia</i>                                                | 0.07855 | 98.09 | 0.183  | 0.0203   | 0.011    | *  | ns |
| <i>Anaeroplasma</i>                                           | 0.07422 | 98.16 | 0.166  | 0.00701  | 0.00684  | ns | ns |
| <i>unclassified Betaproteobacteria</i>                        | 0.07238 | 98.23 | 0.164  | 0.00917  | 0.000811 | *  | *  |
| <i>Christensenella</i>                                        | 0.07214 | 98.31 | 0.172  | 0.0354   | 0.0142   | ns | ns |
| <i>Saccharofermentans</i>                                     | 0.06642 | 98.37 | 0.15   | 0.00553  | 0.00915  | ns | ns |
| <i>Marvinbryantia</i>                                         | 0.06441 | 98.44 | 0.145  | 0.0151   | 0.00243  | ns | *  |
| <i>Eisenbergiella</i>                                         | 0.06224 | 98.5  | 0.139  | 0.011    | 0        | ns | *  |
| <i>Coproccoccus</i>                                           | 0.06146 | 98.56 | 0.139  | 0.0143   | 0.00334  | ns | ns |
| <i>Dehalobacterium</i>                                        | 0.05634 | 98.62 | 0.119  | 0.0343   | 0.00326  | ns | ns |
| <i>Stomatobaculum</i>                                         | 0.0544  | 98.67 | 0.12   | 0.0157   | 0.0122   | *  | ns |
| <i>Mobilitalea</i>                                            | 0.05345 | 98.73 | 0.122  | 0.00262  | 0        | *  | *  |
| <i>Romboutsia</i>                                             | 0.05153 | 98.78 | 0.0955 | 0.0337   | 0.0131   | ns | ns |
| <i>Anaerobacterium</i>                                        | 0.05044 | 98.83 | 0.106  | 0.0307   | 0        | ns | ns |
| <i>Bilophila</i>                                              | 0.04971 | 98.88 | 0.112  | 0.0161   | 0.00413  | ns | ns |
| <i>Anaeromassilibacillus</i>                                  | 0.04782 | 98.93 | 0.106  | 0.0127   | 0.000863 | ns | ns |
| <i>unclassified Clostridiales Family XIII. Incertae Sedis</i> | 0.04687 | 98.97 | 0.107  | 0.0107   | 0.00167  | ns | ns |
| <i>Anaerostipes</i>                                           | 0.04461 | 99.02 | 0.102  | 0.00424  | 0.00261  | *  | *  |
| <i>Pseudoflavonifractor</i>                                   | 0.04378 | 99.06 | 0.0996 | 0.00995  | 0.00417  | *  | ns |
| <i>Gracilibacter</i>                                          | 0.04368 | 99.1  | 0.0982 | 0.0163   | 0.00411  | ns | ns |
| <i>Oribacterium</i>                                           | 0.03465 | 99.14 | 0.0787 | 0.00412  | 0        | *  | *  |
| <i>Natranaerovirga</i>                                        | 0.03204 | 99.17 | 0.0722 | 0.00628  | 0        | *  | ns |
| <i>Flavonifractor</i>                                         | 0.03173 | 99.2  | 0.0721 | 0.000875 | 0.00167  | *  | *  |
| <i>Massilia</i>                                               | 0.02901 | 99.23 | 0.0659 | 0        | 0        | *  | *  |
| <i>Cohaesibacter</i>                                          | 0.02854 | 99.26 | 0.0166 | 0.056    | 0        | ns | ns |
| <i>unclassified Erysipelotrichia</i>                          | 0.02706 | 99.29 | 0.0611 | 0.00262  | 0.00163  | ns | *  |
| <i>Murimonas</i>                                              | 0.02618 | 99.31 | 0.0566 | 0.0101   | 0.00334  | ns | ns |
| <i>Hungatella</i>                                             | 0.02577 | 99.34 | 0.0567 | 0.00552  | 0.00331  | ns | ns |
| <i>Cryptanaerobacter</i>                                      | 0.0256  | 99.36 | 0.057  | 0.00525  | 0.000816 | ns | ns |
| <i>Catabacter</i>                                             | 0.025   | 99.39 | 0.0431 | 0.0233   | 0.0203   | ns | ns |
| <i>unclassified Eubacteriaceae</i>                            | 0.0212  | 99.41 | 0.0481 | 0.00163  | 0        | *  | *  |
| <i>Nocardioides</i>                                           | 0.02057 | 99.43 | 0.0468 | 0        | 0        | *  | *  |
| <i>unclassified Clostridiaceae</i>                            | 0.02035 | 99.45 | 0.0462 | 0.00156  | 0        | *  | *  |

|                                                 |          |       |         |          |          |    |    |
|-------------------------------------------------|----------|-------|---------|----------|----------|----|----|
| <i>Peptococcus</i>                              | 0.01982  | 99.47 | 0.0436  | 0.00484  | 0.000807 | ns | ns |
| <i>Herbinix</i>                                 | 0.0198   | 99.49 | 0.0446  | 0.00175  | 0        | *  | *  |
| <i>Olsenella</i>                                | 0.01908  | 99.51 | 0.0375  | 0.00983  | 0        | ns | ns |
| <i>Fusicatenibacter</i>                         | 0.01631  | 99.53 | 0.0371  | 0.000722 | 0        | *  | *  |
| <i>Enterorhabdus</i>                            | 0.01582  | 99.54 | 0.0111  | 0.0295   | 0        | ns | ns |
| <i>Hespellia</i>                                | 0.01572  | 99.56 | 0.0359  | 0.00238  | 0        | *  | *  |
| <i>Sutterella</i>                               | 0.01558  | 99.57 | 0.0355  | 0.000875 | 0.000816 | *  | *  |
| <i>Butyricoccus</i>                             | 0.01462  | 99.59 | 0.0318  | 0.00324  | 0        | ns | ns |
| <i>Falsiporphyromonas</i>                       | 0.01433  | 99.6  | 0.0322  | 0        | 0.000807 | ns | ns |
| <i>Ruthenibacterium</i>                         | 0.01372  | 99.62 | 0.0266  | 0.00665  | 0.00565  | ns | ns |
| <i>Sporobacter</i>                              | 0.01267  | 99.63 | 0.0287  | 0.000875 | 0        | *  | *  |
| <i>Butyrivibrio</i>                             | 0.01237  | 99.64 | 0.019   | 0.0144   | 0.00332  | ns | ns |
| <i>Anaerovorax</i>                              | 0.0121   | 99.65 | 0.0252  | 0.00507  | 0.000861 | ns | ns |
| <i>Abyssivirga</i>                              | 0.01192  | 99.67 | 0.0276  | 0.00315  | 0.000807 | *  | ns |
| <i>unclassified Ruminococcaceae</i>             | 0.0116   | 99.68 | 0.0264  | 0        | 0        | *  | *  |
| <i>Chitinimonas</i>                             | 0.01115  | 99.69 | 0.0243  | 0.00175  | 0        | ns | ns |
| <i>unclassified Clostridia</i>                  | 0.01088  | 99.7  | 0.0212  | 0.00237  | 0.00651  | *  | ns |
| <i>Falcatimonas</i>                             | 0.0105   | 99.71 | 0.0235  | 0.00405  | 0        | ns | ns |
| <i>Fournierella</i>                             | 0.01033  | 99.72 | 0.0127  | 0.013    | 0        | ns | ns |
| <i>Alkalibaculum</i>                            | 0.009789 | 99.73 | 0.0205  | 0.00397  | 0        | ns | ns |
| <i>Azoarcus</i>                                 | 0.009532 | 99.74 | 0.0217  | 0        | 0        | ns | ns |
| <i>Herbaspirillum</i>                           | 0.008934 | 99.75 | 0.0201  | 0.000875 | 0        | *  | *  |
| <i>unclassified Porphyromonadaceae</i>          | 0.008873 | 99.76 | 0.0192  | 0.00342  | 0        | ns | ns |
| <i>unclassified Candidatus Saccharibacteria</i> | 0.008775 | 99.77 | 0.0171  | 0.00623  | 0        | ns | ns |
| <i>Papillibacter</i>                            | 0.008263 | 99.77 | 0.0178  | 0.00342  | 0        | *  | *  |
| <i>unclassified Alphaproteobacteria</i>         | 0.008213 | 99.78 | 0.0168  | 0.00775  | 0.00604  | ns | ns |
| <i>Erysipelatoclostridium</i>                   | 0.008022 | 99.79 | 0.0134  | 0.00818  | 0        | ns | ns |
| <i>Kopriimonas</i>                              | 0.007921 | 99.8  | 0.0177  | 0.00167  | 0        | *  | *  |
| <i>unclassified Paenibacillaceae</i>            | 0.007059 | 99.81 | 0.0153  | 0.00167  | 0        | ns | ns |
| <i>Intestinibacter</i>                          | 0.006989 | 99.81 | 0.0155  | 0.000875 | 0        | ns | ns |
| <i>Desulfonatronum</i>                          | 0.006851 | 99.82 | 0.0152  | 0.0008   | 0        | ns | ns |
| <i>Azospira</i>                                 | 0.006673 | 99.83 | 0.0135  | 0.0041   | 0        | *  | *  |
| <i>Parvibacter</i>                              | 0.006554 | 99.83 | 0.00861 | 0.00826  | 0.00244  | ns | ns |
| <i>Defluviitalea</i>                            | 0.006358 | 99.84 | 0.0142  | 0.00318  | 0.00167  | *  | ns |
| <i>Acetanaerobacterium</i>                      | 0.006201 | 99.85 | 0.0122  | 0.00162  | 0.00248  | ns | ns |
| <i>Enterococcus</i>                             | 0.005895 | 99.85 | 0.00938 | 0.0061   | 0.00163  | ns | ns |
| <i>Faecalibacterium</i>                         | 0.005825 | 99.86 | 0.00923 | 0.00408  | 0.00757  | ns | ns |
| <i>unclassified Erysipelotrichaceae</i>         | 0.005421 | 99.86 | 0.0117  | 0.00149  | 0        | ns | ns |
| <i>Syntrophococcus</i>                          | 0.00524  | 99.87 | 0.0114  | 0.000747 | 0        | ns | ns |
| <i>Lachnoanaerobaculum</i>                      | 0.005014 | 99.87 | 0.0114  | 0        | 0        | ns | ns |
| <i>Candidatus Vestibaculum</i>                  | 0.004872 | 99.88 | 0.0111  | 0        | 0        | ns | ns |
| <i>Kluyvera</i>                                 | 0.004766 | 99.88 | 0       | 0        | 0.0115   | ns | ns |

|                                           |          |       |          |          |          |    |    |
|-------------------------------------------|----------|-------|----------|----------|----------|----|----|
| <i>Anaerosporebacter</i>                  | 0.00459  | 99.89 | 0.00951  | 0.00175  | 0        | ns | ns |
| <i>Methyloversatilis</i>                  | 0.004391 | 99.89 | 0.00997  | 0        | 0        | ns | ns |
| <i>Atopobium</i>                          | 0.00433  | 99.9  | 0.00984  | 0        | 0        | ns | ns |
| <i>Alkalibacter</i>                       | 0.00431  | 99.9  | 0.0061   | 0.00502  | 0        | ns | ns |
| <i>unclassified Mollicutes</i>            | 0.004144 | 99.9  | 0.00942  | 0        | 0        | ns | ns |
| <i>Ethanoligenens</i>                     | 0.003927 | 99.91 | 0.00892  | 0        | 0        | ns | ns |
| <i>Lutispora</i>                          | 0.003814 | 99.91 | 0.00867  | 0        | 0        | ns | ns |
| <i>Alkaliphilus</i>                       | 0.003804 | 99.92 | 0.00533  | 0.00422  | 0.000807 | ns | ns |
| <i>Mageeibacillus</i>                     | 0.003792 | 99.92 | 0.00602  | 0.00227  | 0.00242  | ns | ns |
| <i>Rubrivivax</i>                         | 0.003588 | 99.92 | 0.00815  | 0        | 0        | ns | ns |
| <i>Holdemania</i>                         | 0.003581 | 99.93 | 0.00766  | 0.00162  | 0        | ns | ns |
| <i>Staphylococcus</i>                     | 0.003559 | 99.93 | 0.000952 | 0.00531  | 0.00439  | ns | ns |
| <i>Sphingobacterium</i>                   | 0.003408 | 99.93 | 0.00775  | 0        | 0        | ns | ns |
| <i>Desulfotobacterium</i>                 | 0.003282 | 99.94 | 0.00746  | 0        | 0        | ns | ns |
| <i>Acetobacter</i>                        | 0.002689 | 99.94 | 0.00611  | 0        | 0        | ns | ns |
| <i>Methylophilus</i>                      | 0.002576 | 99.94 | 0.00585  | 0        | 0        | ns | ns |
| <i>Parapedobacter</i>                     | 0.002543 | 99.94 | 0.00578  | 0        | 0        | ns | ns |
| <i>Insolitispirillum</i>                  | 0.002376 | 99.95 | 0.00435  | 0.00162  | 0        | ns | ns |
| <i>Candidatus Stoquefichus</i>            | 0.002375 | 99.95 | 0.00504  | 0.000875 | 0        | ns | ns |
| <i>Aestuariispira</i>                     | 0.002337 | 99.95 | 0        | 0.00531  | 0        | ns | ns |
| <i>Caproiciproducens</i>                  | 0.002064 | 99.95 | 0.00469  | 0        | 0        | ns | ns |
| <i>Chloroflexus</i>                       | 0.002035 | 99.96 | 0.00203  | 0.0016   | 0.00161  | ns | ns |
| <i>Asaccharospora</i>                     | 0.001962 | 99.96 | 0.00389  | 0.000875 | 0        | ns | ns |
| <i>Hathewayia</i>                         | 0.001961 | 99.96 | 0.00399  | 0.000725 | 0        | ns | ns |
| <i>Paeniclostridium</i>                   | 0.001956 | 99.96 | 0.00388  | 0.000875 | 0        | ns | ns |
| <i>Casaltella</i>                         | 0.001914 | 99.96 | 0.00181  | 0.000725 | 0.00248  | ns | ns |
| <i>Dysgonomonas</i>                       | 0.001912 | 99.97 | 0.00435  | 0        | 0        | ns | ns |
| <i>unclassified Peptostreptococcaceae</i> | 0.001801 | 99.97 | 0.00409  | 0        | 0        | ns | ns |
| <i>Moryella</i>                           | 0.001752 | 99.97 | 0.00398  | 0        | 0        | ns | ns |
| <i>unclassified Alcaligenaceae</i>        | 0.001743 | 99.97 | 0.00396  | 0        | 0        | ns | ns |
| <i>unclassified Anaeroplasmatales</i>     | 0.001709 | 99.97 | 0.00389  | 0        | 0        | ns | ns |
| <i>Anaerobium</i>                         | 0.001664 | 99.97 | 0.00311  | 0.000875 | 0        | ns | ns |
| <i>Aerococcus</i>                         | 0.001656 | 99.98 | 0        | 0.0025   | 0.00162  | ns | ns |
| <i>Salmonella</i>                         | 0.001569 | 99.98 | 0.00121  | 0        | 0.00265  | ns | ns |
| <i>unclassified Bacteroidia</i>           | 0.001555 | 99.98 | 0.00287  | 0.000752 | 0        | ns | ns |
| <i>Aminicella</i>                         | 0.00151  | 99.98 | 0.00276  | 0.000875 | 0        | ns | ns |
| <i>Caloranaerobacter</i>                  | 0.001411 | 99.98 | 0.00321  | 0        | 0        | ns | ns |
| <i>Brassicibacter</i>                     | 0.001411 | 99.98 | 0.00321  | 0        | 0        | ns | ns |
| <i>Kiloniella</i>                         | 0.001342 | 99.98 | 0.00305  | 0        | 0        | ns | ns |
| <i>Sideroxydans</i>                       | 0.001296 | 99.99 | 0.00294  | 0        | 0        | ns | ns |
| <i>Bacillus</i>                           | 0.001246 | 99.99 | 0.00283  | 0        | 0        | ns | ns |
| <i>Mycobacterium</i>                      | 0.00112  | 99.99 | 0.00193  | 0.0008   | 0        | ns | ns |
| <i>Comamonas</i>                          | 0.001064 | 99.99 | 0.00242  | 0        | 0        | ns | ns |
| <i>Herbivorax</i>                         | 0.000999 | 99.99 | 0.000905 | 0.00155  | 0        | ns | ns |



|                           |           |       |          |          |          |    |    |
|---------------------------|-----------|-------|----------|----------|----------|----|----|
| <i>Caldimonas</i>         | 0.0009638 | 99.99 | 0.00219  | 0        | 0        | ns | ns |
| <i>Gloeobacter</i>        | 0.0009608 | 99.99 | 0.00218  | 0        | 0        | ns | ns |
| <i>Parasporobacterium</i> | 0.0009506 | 99.99 | 0.00216  | 0        | 0        | ns | ns |
| <i>Variovorax</i>         | 0.000861  | 99.99 | 0.00196  | 0        | 0        | ns | ns |
| <i>Natronincola</i>       | 0.0008588 | 99.99 | 0.00195  | 0        | 0        | ns | ns |
| <i>Shuttleworthia</i>     | 0.0008193 | 100   | 0.00186  | 0        | 0        | ns | ns |
| <i>Terrisporobacter</i>   | 0.0007469 | 100   | 0.000976 | 0        | 0.000863 | ns | ns |
| <i>Corynebacterium</i>    | 0.0006915 | 100   | 0        | 0.0008   | 0.000919 | ns | ns |
| <i>Thermotalea</i>        | 0.0005318 | 100   | 0.00121  | 0        | 0        | ns | ns |
| <i>Geosporobacter</i>     | 0.000432  | 100   | 0.000981 | 0        | 0        | ns | ns |
| <i>Breznakia</i>          | 0.0004294 | 100   | 0.000976 | 0        | 0        | ns | ns |
| <i>Schlegelella</i>       | 0.000429  | 100   | 0.000975 | 0        | 0        | ns | ns |
| <i>Mangroviflexus</i>     | 0.0004209 | 100   | 0.000957 | 0        | 0        | ns | ns |
| <i>Gemmiger</i>           | 0.0003591 | 100   | 0        | 0.000816 | 0        | ns | ns |
| <i>Pedobacter</i>         | 0.0003357 | 100   | 0        | 0        | 0.000811 | ns | ns |

\*: Friedman followed by Dunn's multiple comparison test,  $p < 0.05$ . ns: non-significant.

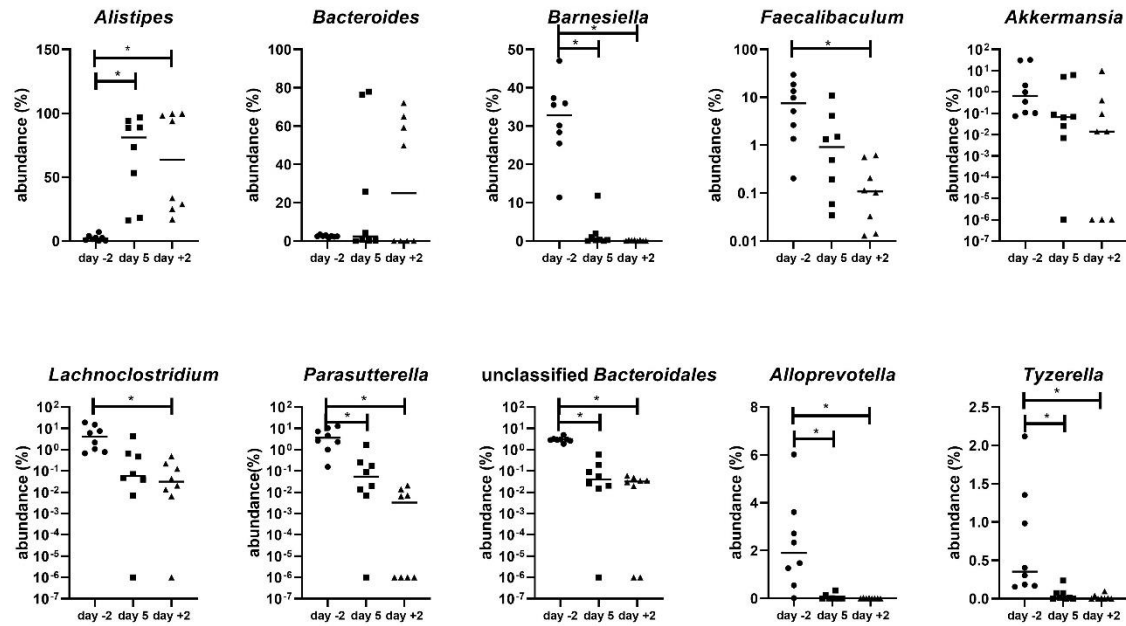

Figure S4: Changes in microbial genera before (day -2), during (day 5) and after (day +2) antibiotic treatment of non-pregnant mice (n=8).

\*: Friedman followed by Dunn's multiple comparison's test,  $p < 0.05$

Figure S4 shows the top 5 bacterial genera of the SIMPER test supplemented with the top 5 bacterial genera of the SIMPER test that were significantly changed at day +2 compared with day -2 for non-pregnant mice. The response of non-pregnant mice was less variable as compared with pregnant mice. All mice increased the genus *Alistipes*, although not all to the same extent. The increase in genus *Alistipes* was either due to an increase in *Alistipes timonensis* or *Alistipes finegoldii*. The two mice with the low increase in genus *Alistipes*, increased genus *Faecalibaculum* (*Faecalibaculum rodentium*). Four mice also increased genus *Bacteroides*. The increase in these specific species was amongst others associated with decreased genera *Barnesiella*, *Lachnoclostridium*, *Parasutterella*, unclassified *Bacteroidales*, unclassified *Clostridiales* and *Turicibacter*. (See also supplementary table 5).

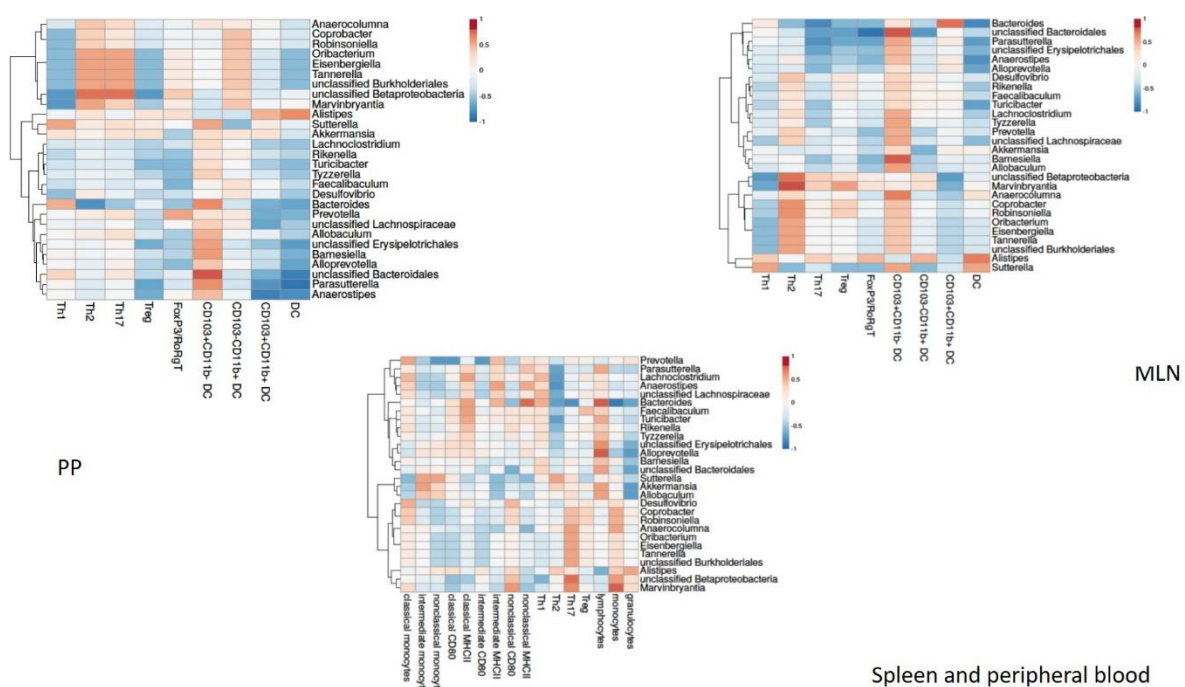

Figure S5: Correlation between immune cell populations in the PP (top left heatmaps), MLN (top right heatmaps) and peripheral cells (lower heatmap) with fecal bacterial genera in non-pregnant mice. The heatmaps show Spearman's correlations coefficients after individual correlation of PPs, MLN or peripheral immune cells (on the x-axis) with bacterial genera that were significantly different between day -2 and day +2 ( $n=8$ ).

For non-pregnant mice, Pearson's correlation coefficients for PP, MLN and peripheral immune cells with bacterial genera that have changed after antibiotic treatment are shown in heatmaps (figure S5). In the PP, various genera correlated negatively with dendritic cells and CD103+CD11b+ dendritic cells. Various other genera correlated positively with Th2 and Th17 cells. CD103+CD11b- dendritic cells also positively correlated with various bacterial genera. For immune cells in the MLN of non-pregnant mice, various bacterial genera correlated positively with CD103+CD11b- dendritic cells, the most prominent were the genus unclassified *Bacteroidales* and the genus *Barnesiella*. Various genera also correlated positively with Th2 cells. Dendritic cells were negatively correlated with the genera *Alistipes* and *Sutterella* but negatively correlated to various other genera, such as genera *Bacteroides* and *Parasutterella*. In the spleen, various bacterial genera correlated negatively with Th2 cells, while other correlated positively with Th17 cells. Also granulocytes, monocytes and lymphocytes correlated with various bacterial genera.

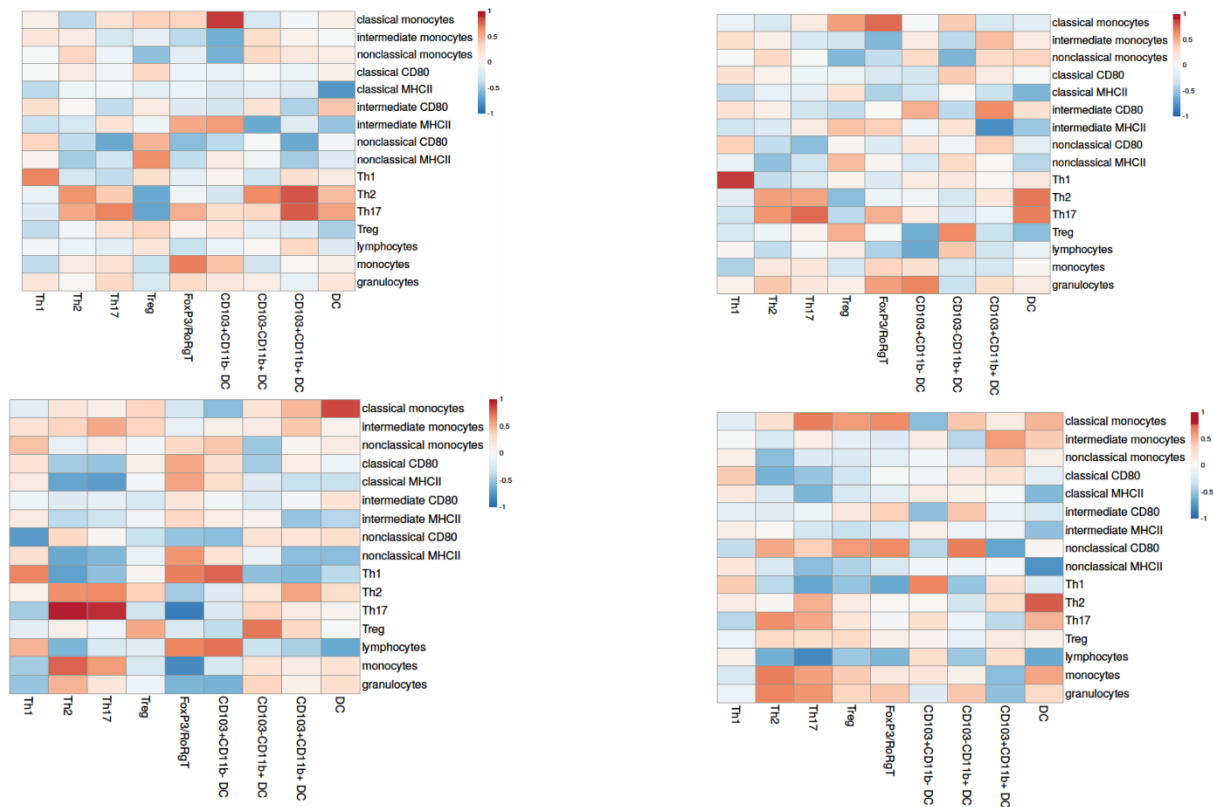

Figure S6: Correlation between immune cell populations in the PPs (left heatmaps) and MLNs (right heatmaps) and peripheral cells in pregnant (top heatmaps) and non-pregnant (lower heatmaps) mice. The heatmaps show Spearman's correlations coefficients after individual correlation of PPs and MLN immune cells (on the x-axis) with peripheral immune cells (on the y-axis).

Intestinal immune responses are under the influence of the microbiome and can regulate peripheral immune responses. Intestinal dendritic cells as well as T cells can circulate to the peripheral circulation, affecting peripheral immune responses. To evaluate the relationship between the intestinal immune cells in the PPs and MLNs with peripheral immune cells, we correlated immune cells from the PPs and MLNs with peripheral immune cells after antibiotic treatment. The heatmaps in figure S6 show the correlation between immune cells in the PPs and MLNs and peripheral immune cells from pregnant mice (top heatmaps). It can be seen that the percentage Th1, Th2 and Th17 cells in the PPs, and even stronger in the MLNs correlated positively with their respective counterparts in the spleen. Various other positive (for instance: CD103+/CD11b+ dendritic cells in the PP correlated positively with Th2 cells and Th17 cells in the spleen) and negative (for instance: dendritic cells in the PP correlated negatively with expression of MHCII on classical monocytes) correlations can be found between PPs and MLNs immune cells and peripheral immune cells.

Also for non-pregnant mice, we found various positive and negative correlations between immune cells in the PPs and MLNs and peripheral immune cells. However, positive

correlations between Th1 cells, Th2 cells and Th17 cells in with their counterparts in the spleen were only found for the PPs and not for the MLNs.
